# Supplementary material
Source: bioRxiv or medRxiv preprint supplement (https://www.biorxiv.org/highwire/filestream/93423/field_highwire_adjunct_files/0/303644-1.pdf)
Supplement: Supplementary file [file 303644-1.pdf]

1 **Title:** Probing compression versus stretch activated recruitment of cortical actin and  
2 apical junction proteins using mechanical stimulations of suspended doublets.

3  
4  
5  
6

**SUPPLEMENTARY FIGURES**

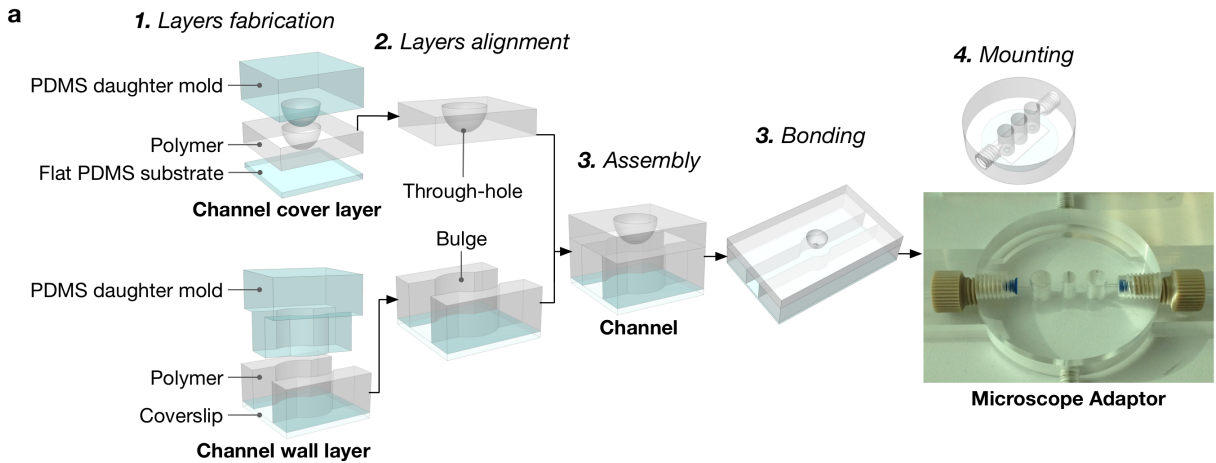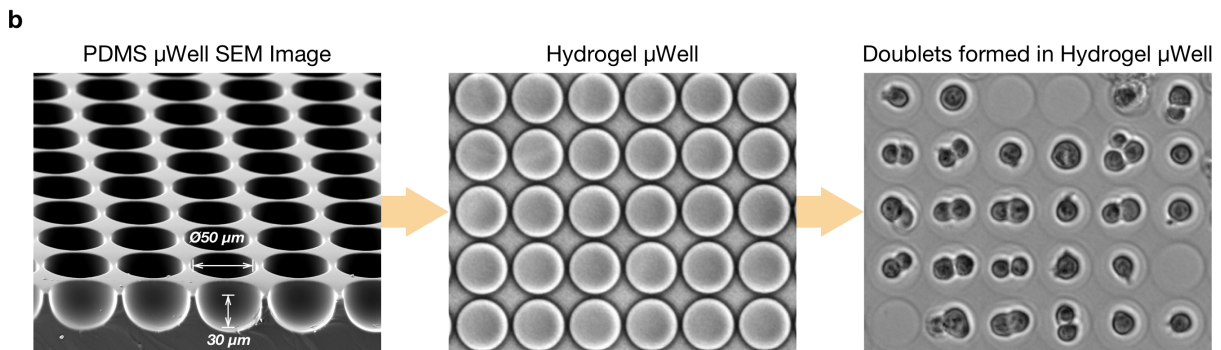

7

8 **Supplementary Figure 1.**

9 (a). Fabrication steps for SJS chip. First, channel cover layer and wall layer  
10 were molded into shape separately. They were then aligned and assembled  
11 properly to position the through-hole on top of the channel bulge, before  
12 mounted to the microscope adaptor. (b). Agarose-based hydrogel (0.8% v/v  
13 in PBS) micro-well arrays for cell doublets preparation. Round-bottom wells of  
14  $50\mu\text{m}$  in diameter and  $30\mu\text{m}$  in depth were closely arranged to maximize the  
15 seeding efficiency.

16

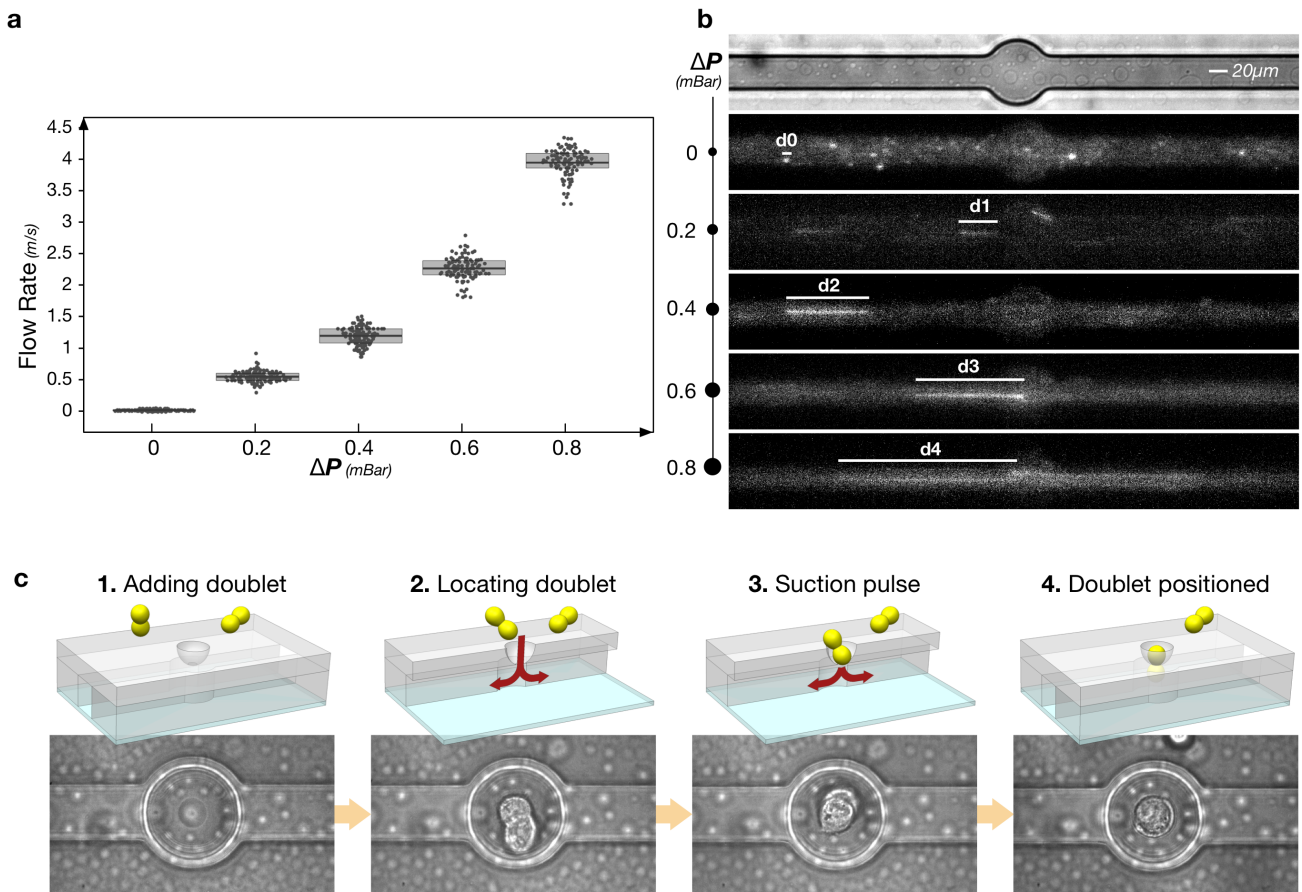

17

18 **Supplementary Figure 2.**

19 **(a).** Correlation between the horizontal pressure difference across the channel  
 20 system and the flow speed within. The pressure difference used in the all  
 21 junction stimulations was adjusted to 0.5-0.8mBar, which corresponded to an  
 22 averaged flow of 2-4m/s in the channel. Mean, 25th and 75th percentiles are  
 23 indicated as boxed bar. **(b).** The flow speed in the channel induced by  
 24 horizontal pressure difference was computed using fluorescent beads, based on  
 25 the distance they traveled within 50ms (n=100-200 beads). **(c).** Positioning  
 26 of doublet in SJS channel. Externally formed S180 cell doublets were loaded  
 27 onto the stretcher from the outside. By applying the same pressure, either  
 28 positive or negative, at both inlets simultaneously, we could create a net  
 29 outward or inward flow across the through-hole. This flow helped to locate  
 30 and select the desired doublet. Once the doublet was in close proximity to the  
 31 through-hole, an inward flux triggered by a pulse of negative pressure might  
 32 quickly capture and position the doublet. Through-hole size  $\varnothing 10\mu\text{m}$ .

33

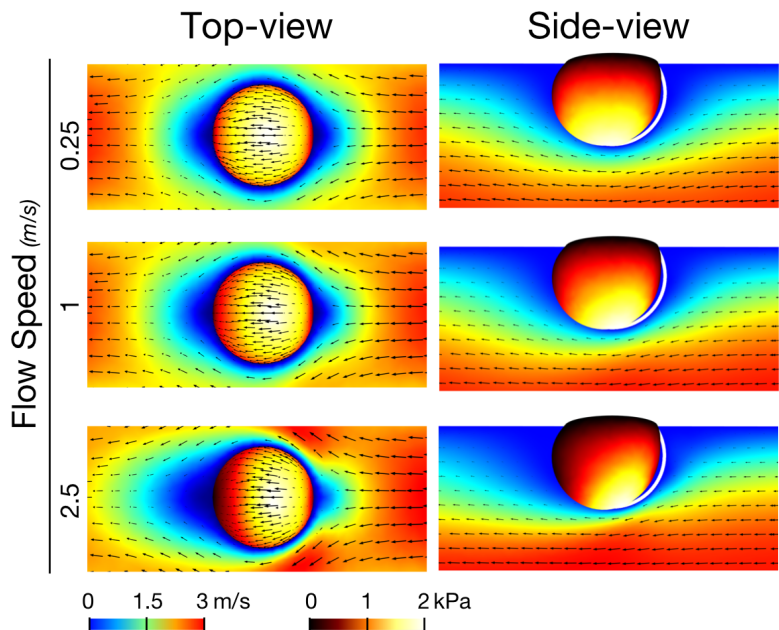

34

35 **Supplementary Figure 3.**

36 FE simulation of the doublet bottom cell in the flow. The cell was subjected to  
 37 an uneven distribution of drag force over its surface. Such stress asymmetry  
 38 increases with the flow speed. Cell size  $\text{\O}15\mu\text{m}$ , contact size  $\text{\O}10\mu\text{m}$ , channel  
 39 width  $40\mu\text{m}$  height  $50\mu\text{m}$ .

40

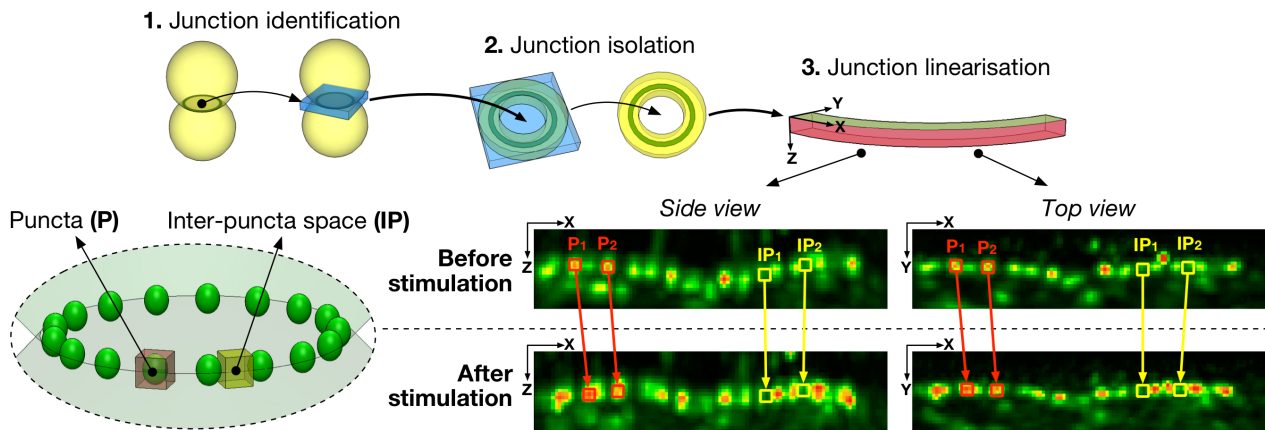

41

42 **Supplementary Figure 4.**

43 3D coordinates identification and tracking based on E-cadherin puncta  
 44 locations. The cell junction region was first identified and isolated according to  
 45 the characteristic E-cadherin junctional signal. It was then trimmed into a  
 46 donut-shape ring before linearized into a band. The 3D coordinates for each  
 47 distinct E-cadherin punctum was identified in this band. The coordinates for  
 48 the same punctum (or inter-puncta space) before and after the stimulation  
 49 were paired up. All coordinates, obtained from the E-cadherin image channel,  
 50 were then directly transferred onto the second image channels (i.e. actin, ZO1,  
 51 occludin, or plasma membrane marker), whereby their intensities in volumes  
 52 of  $1\mu\text{m} \times 1\mu\text{m} \times 1\mu\text{m}$  (width, length, height) centered at these coordinates  
 53 were integrated and compared between before and after stimulation.

54



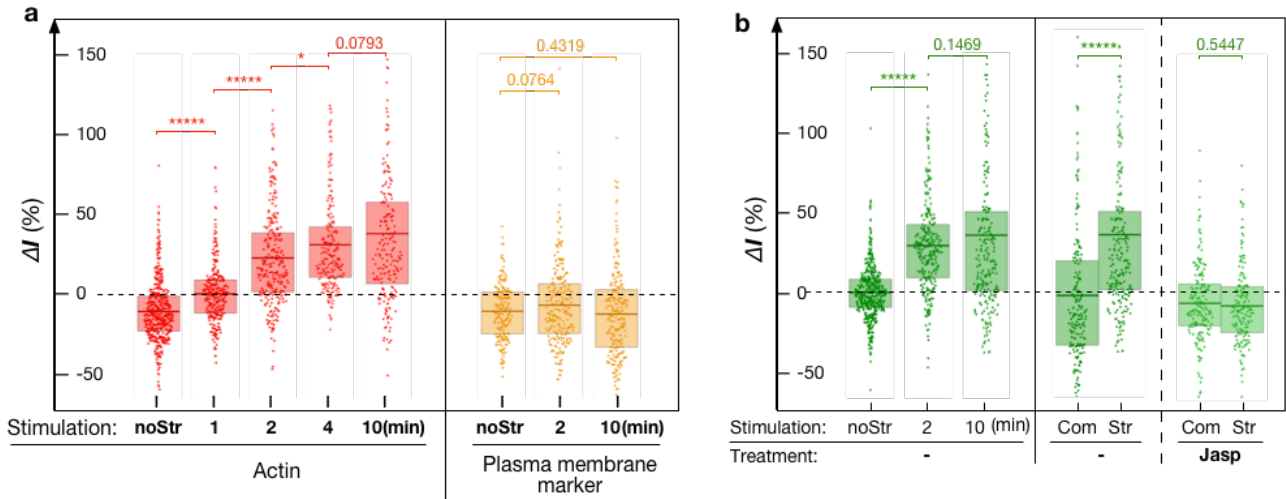

55 **Supplementary Figure 5.**

56 **(a).** Analysis of stretch-induced actin junctional recruitment at E-cadherin  
 57 puncta regions as a function of stimulation time (n=250-450 puncta). Plasma  
 58 membrane marker serves as a control (n=200-250 puncta). noStr: no  
 59 stimulation (static) control. Decrease of signal in noStr case signifies the  
 60 bleaching of mApple fluorescent tag. **(b).** Single puncta analysis ( $\Delta I$ : relative  
 61 recruitment in %) of the time dependence for E-cadherin (n=250-450 puncta).  
 62 The recruitment occurs on the 2-minute time scale as for actin. In the case of  
 63 a 1-sided stimulation (10 min) only the stretched side showed cadherin  
 64 reinforcement ( $35.3 \pm 4.0\%SE$ ), which is abolished in presence of  
 65 Jasplakinolide. Com: Compressed side; Str: stretched side; noStr: no  
 66 stimulation case. Statistics has been performed via two-sample t-test with \* for  
 67  $p < 0.05$ , \*\* for  $p < 1 \times 10^{-2}$ , \*\*\* for  $p < 1 \times 10^{-3}$ , \*\*\*\* for  $p < 1 \times 10^{-4}$ , \*\*\*\*\* for  
 68  $p < 1 \times 10^{-5}$ . Mean, 25th and 75th percentiles are indicated as boxed bar.

69

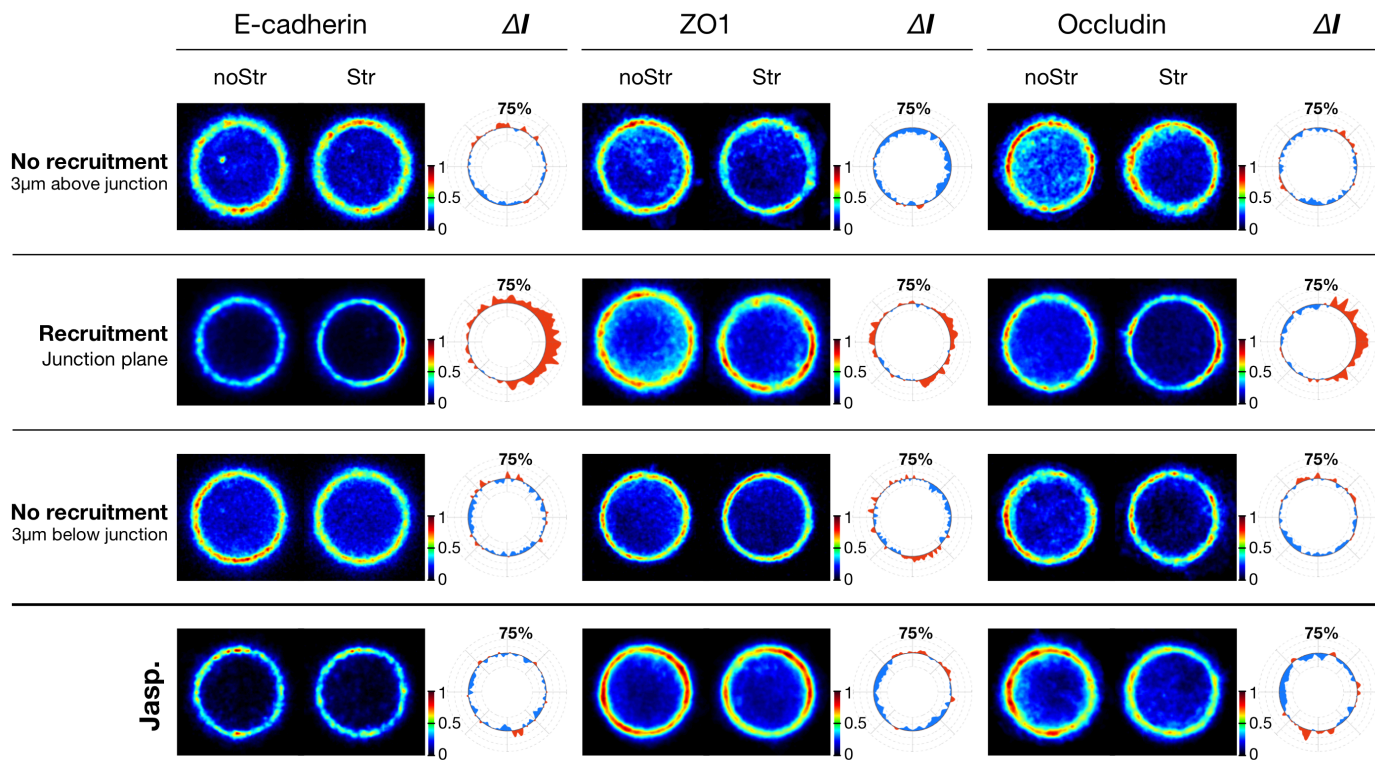

70

71 **Supplementary Figure 6.**

72 Junctional proteins mechanosensitivities in response to 10-min left-sided  
 73 junction stimulation. E-cadherin (n=20 doublets), ZO-1 (n=8 doublets) and  
 74 Occludin (n=11 doublets) were enriched at the cell contact region.  
 75 Asymmetrical mode of stimulation resulted in directional recruitment of the  
 76 proteins giving rise to a seemingly horizontally polarized junction. Treatment  
 77 with Jasplakinolide (100nM, 1hr) abolished such polarized recruitment (n=10  
 78 doublets). Images were normalized separately as noStr vs. Str pairs for  
 79 different focal planar locations.

80

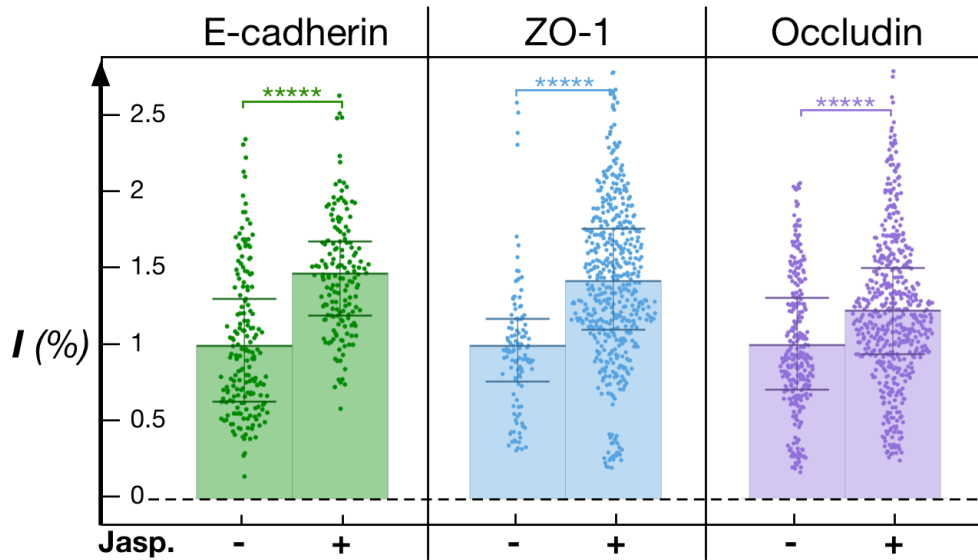

81

82 **Supplementary Figure 7.**

83 Effect of Jasplakinolide on junction proteins. Treatment of Jasplakinolide  
 84 (100nM, 60min) induced global increases in E-cadherin ( $47 \pm 3\%$ s.e.m.,  
 85  $n=200$  punctate regions from 20 junctions), ZO-1 ( $42 \pm 2\%$ s.e.m.,  $n=150-400$   
 86 punctate regions from 8 junctions) and Occludin ( $22 \pm 2\%$ s.e.m.,  $n=150-400$   
 87 punctate regions from 11 junctions) along the entire junctions. Statistics has  
 88 been performed via two-sample t-test with \* for  $p < 0.05$ , \*\* for  $p < 1 \times 10^{-2}$ , \*\*\*  
 89 for  $p < 1 \times 10^{-3}$ , \*\*\*\* for  $p < 1 \times 10^{-4}$ , \*\*\*\*\* for  $p < 1 \times 10^{-5}$ . Mean, 25th  
 90 percentiles are indicated on the bar.

91

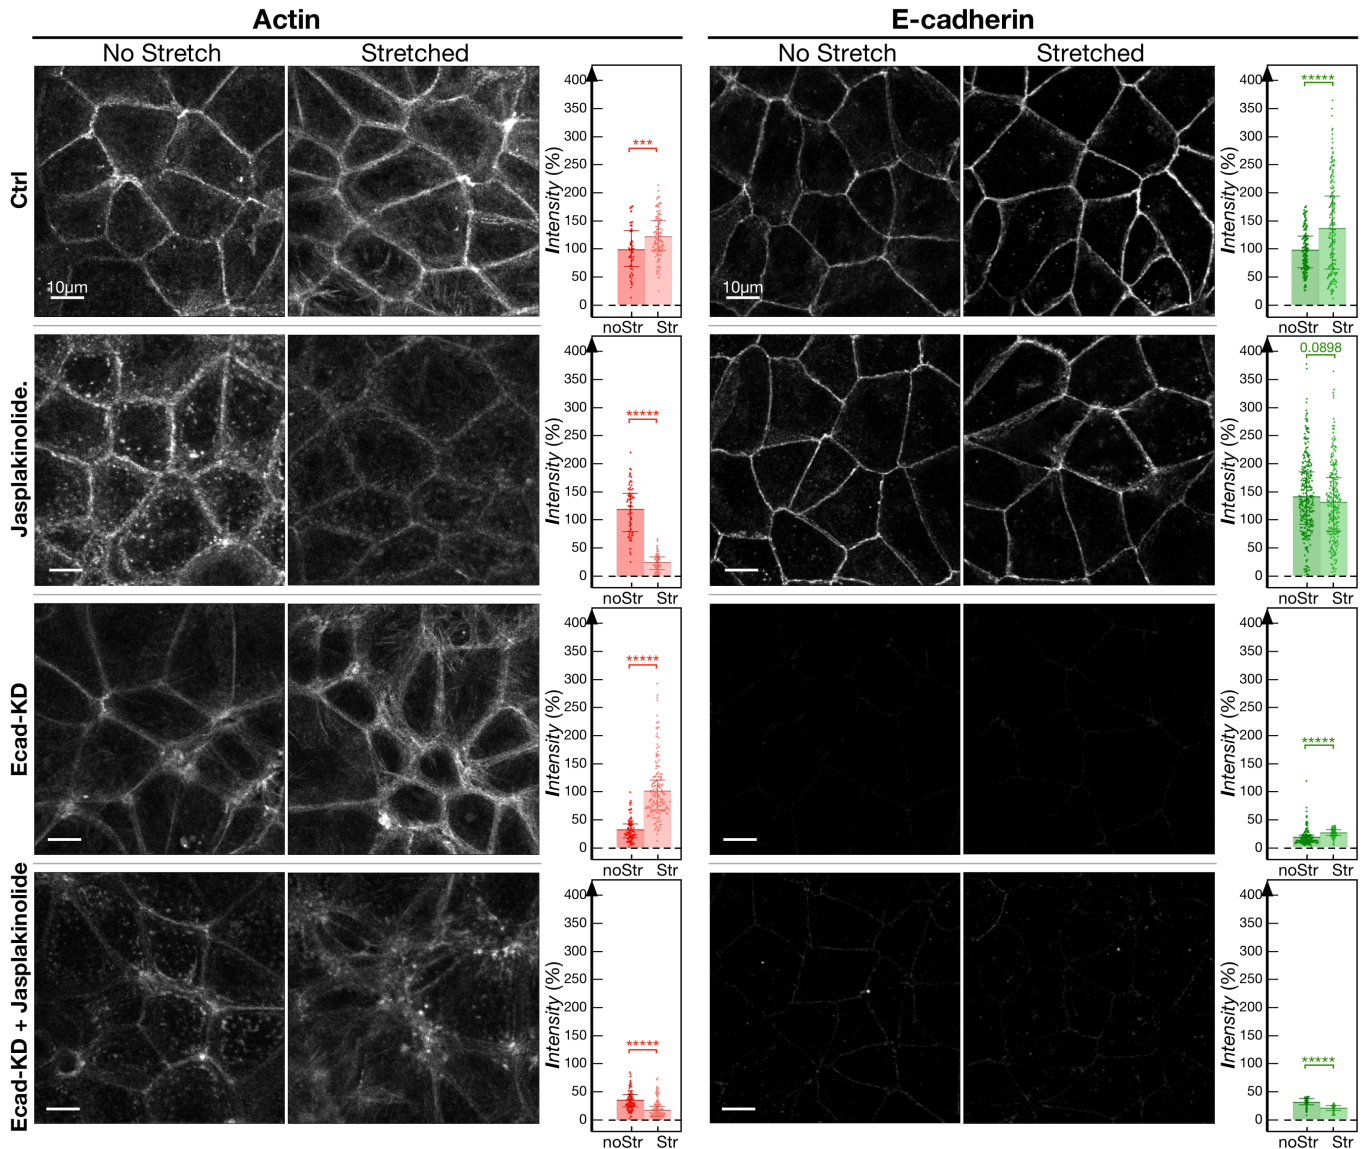

92

93

94 **Supplementary Figure 8.**

95 Effect of equiaxial stretching on junctional actin (n=60-150 junctions) and E-  
 96 cadherin (n=70-300 junctions). The monolayers were immunostained for  
 97 actin (AlexaFluor® 647) and E-cadherin (AlexaFluor® 546). Maximum  
 98 projections (thickness 2µm) of representative image volumes containing apical  
 99 junctions of Caco-2 monolayer were shown alongside the quantifications of  
 100 junction intensity from linescan analysis (normalized to the No Stretch &  
 101 Control condition). Statistics has been performed via two-sample t-test with \*  
 102 for p<0.05, \*\* for p<1x10<sup>-2</sup>, \*\*\* for p<1x10<sup>-3</sup>, \*\*\*\* for p<1x10<sup>-4</sup>, \*\*\*\*\* for  
 103 p<1x10<sup>-5</sup>. Mean, 25th and 75th percentiles are indicated on the bar.

104

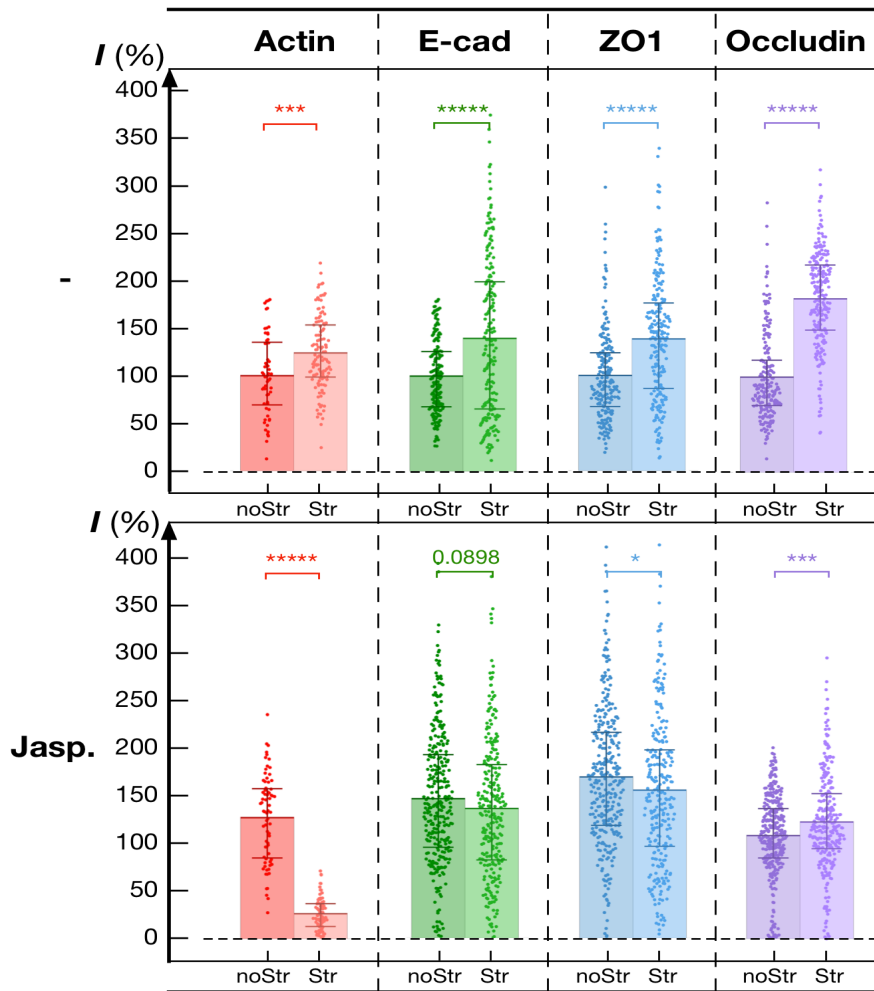

105  
106  
107  
108  
109  
110  
111  
112  
113  
114  
115  
116  
117  
118  
119

**Supplementary Figure 9.: Mechanosensitive junctional response in monolayer.**

Effect of equiaxial stretching on the recruitment of proteins at cell junctions in Caco-2 monolayer (n=60-200 junctions for actin, n=70-300 junctions for E-cadherin, ZO-1 and Occludin). The monolayer was stretched on a commercial biaxial stretcher (Flexcell™) for 5 minutes at 10% constant strain. Control case (Ctrl), Jasplakinolide treatment (100nM, 60min) (Jasp.). Quantifications of junction intensity are based on linescan analysis (normalized to the No Stretch & Control condition). Str: stretched case; noStr: no stimulation case. Statistics has been performed via two-sample t-test with \* for  $p < 0.05$ , \*\* for  $p < 1 \times 10^{-2}$ , \*\*\* for  $p < 1 \times 10^{-3}$ , \*\*\*\* for  $p < 1 \times 10^{-4}$ , \*\*\*\*\* for  $p < 1 \times 10^{-5}$ . Mean, 25th and 75th percentiles are indicated on the bar.



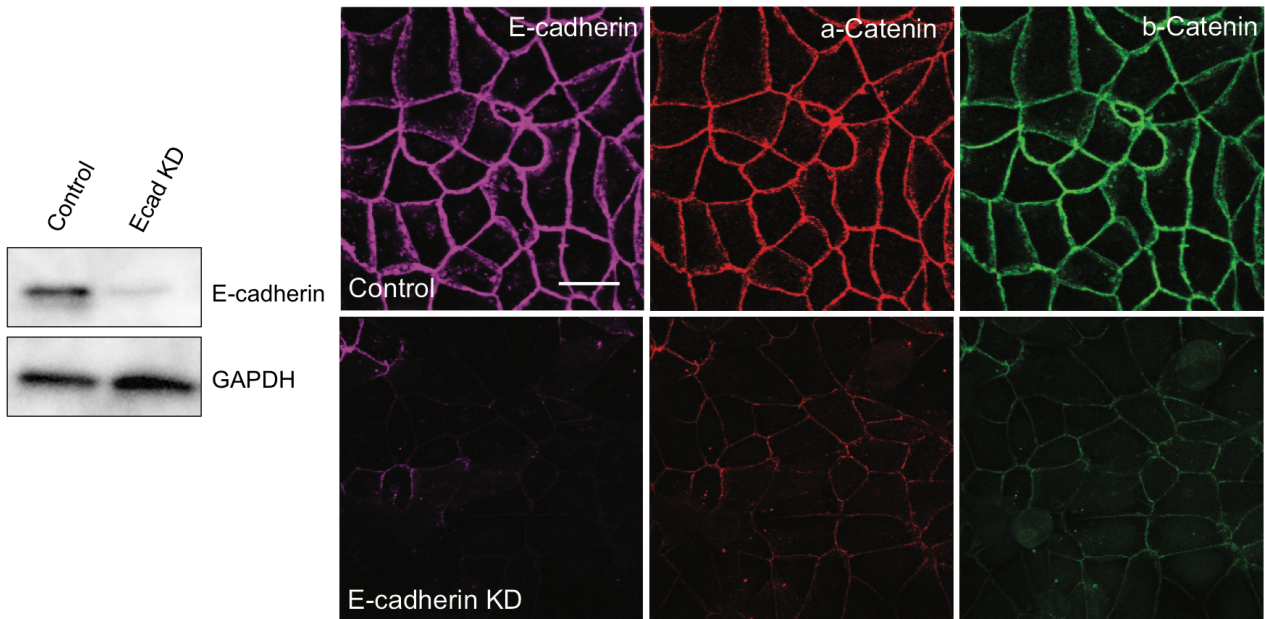

120

121 **Supplementary Figure 10.**

122 E-cadherin knockdown by RNAi was verified with western blotting. An overall  
 123 reduction of ~80% in total protein level was detected. Immunofluorescent

124 staining of E-cadherin,  $\alpha$ -catenin and  $\beta$ -catenin was immunofluorescently

125 stained to confirm the E-cadherin knockdown at cell junctions in monolayer.

126 Scale bar 20 $\mu$ m.

127



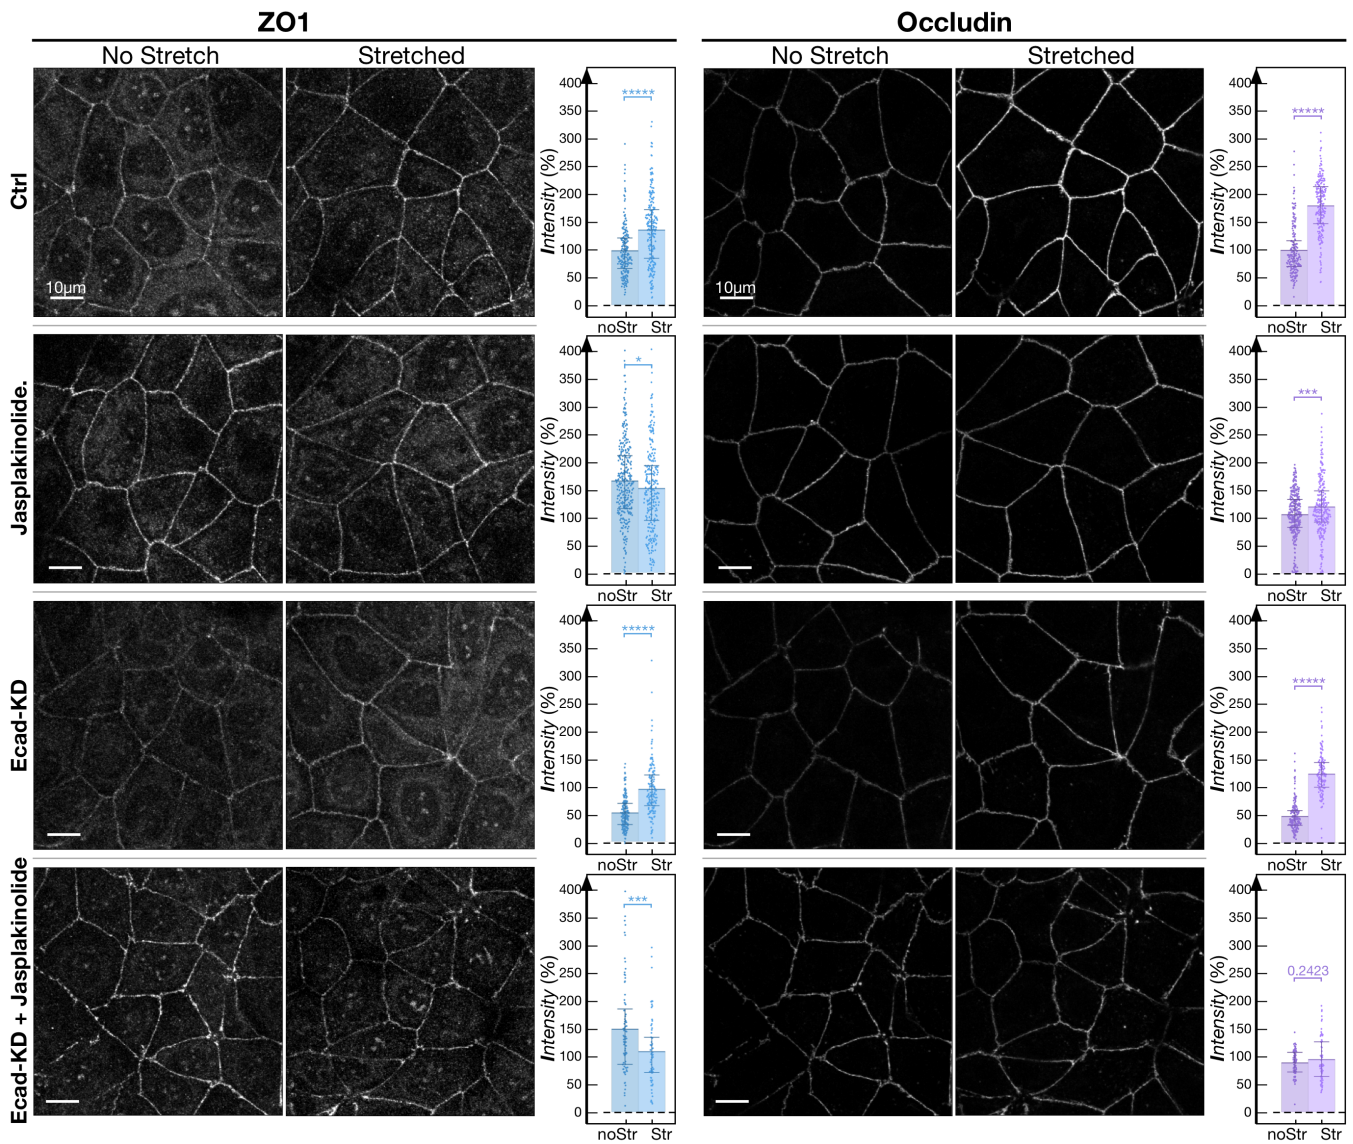

128

129 **Supplementary Figure 11.**

130 Effect of equiaxial stretching on junctional ZO-1 (n=70-300 junctions) and  
 131 occludin (n=70-300 junctions). The monolayers were immunostained ZO-1  
 132 (AlexaFluor® 488) and Occludin (AlexaFluor® 647). Maximum projections  
 133 (thickness 2µm) of representative image volumes containing apical junctions  
 134 of Caco-2 monolayer were shown alongside the quantifications of junction  
 135 intensity from linescan analysis (normalized to the No Stretch & Control  
 136 condition). Statistics has been performed via two-sample t-test with \* for  
 137  $p < 0.05$ , \*\* for  $p < 1 \times 10^{-2}$ , \*\*\* for  $p < 1 \times 10^{-3}$ , \*\*\*\* for  $p < 1 \times 10^{-4}$ , \*\*\*\*\* for  
 138  $p < 1 \times 10^{-5}$ . Mean, 25th and 75th percentiles are indicated on the bar.
